# Supplementary material
Source: Springer Nature journal article supplement (https://www.springermedizin.de/resource/supplementary/12903_2013_385_MOESM3_ESM.pdf/9516914)

■ Dental Equipment   ■ Dental consumables   ■ Salary   ■ Administration

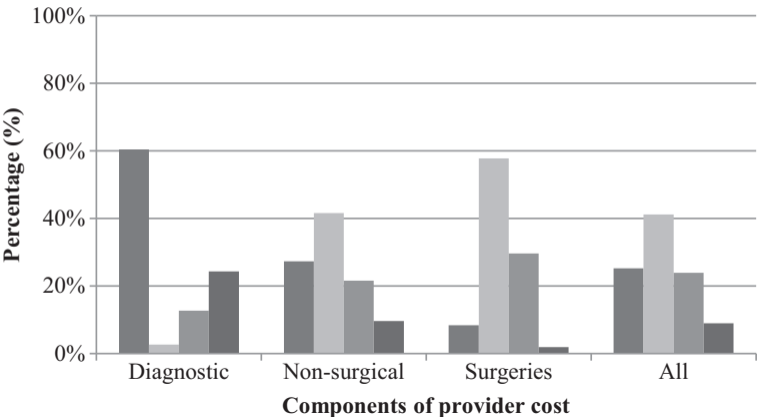

Supplement: MOESM3 [file 9516914]
